# Supplementary material for: Estimation of Real-Time Rainfall Fields Reflecting the Mountain Effect of Rainfall Explained by the WRF Rainfall Fields
Source: MDPI journal article supplement (doi:10.3390/w15091794), 2023-05-07
Supplement: s1 [file s1]

## Supplementary Materials

### Supplementary figures:

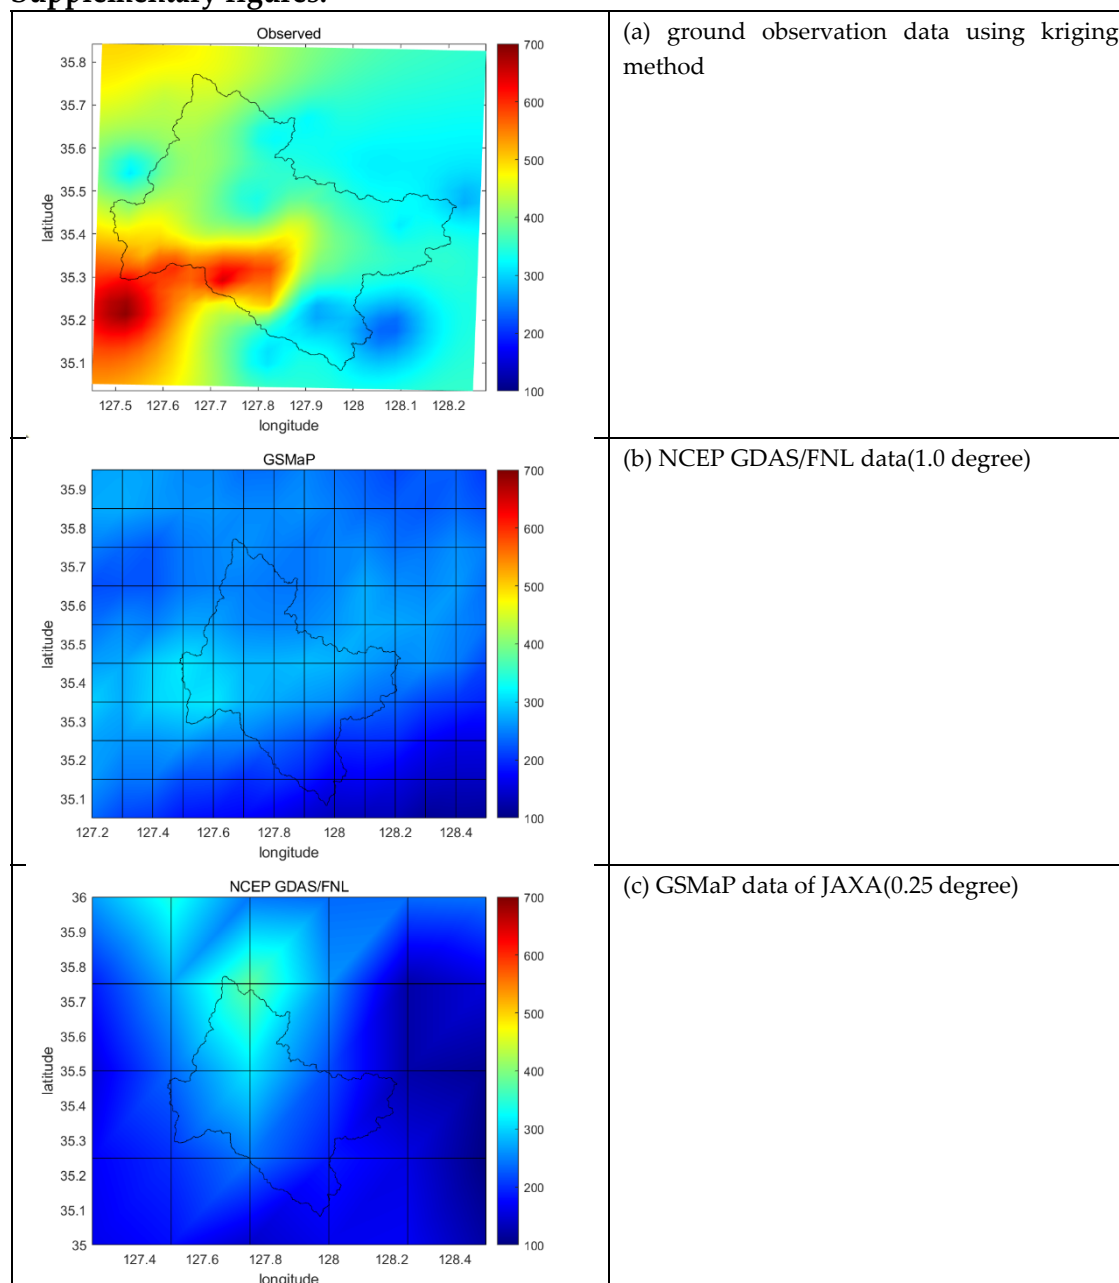

**Figure S1.** Spatial distribution of the cumulative rainfall depth(mm) of the 2020 event (a) ground observation data using kriging method, (b) NCEP GDAS/FNL data, (c) GSMap data of JAXA.
