# Supplementary material for: Estimation of Real-Time Rainfall Fields Reflecting the Mountain Effect of Rainfall Explained by the WRF Rainfall Fields
Source: MDPI journal article supplement (doi:10.3390/w15091794), 2023-05-07
Supplement: s1 [file s1]

Archive with 1 entries (1 files):
- water-2288017-supplementary.pdf
